# Supplementary material for: Hypnotic analgesia reduces brain responses to pain seen in others
Source: PubMed Central journal article supplement (PMC5575101; doi:10.1038/s41598-017-10310-4), 2017-08-29
Supplement: 41598_2017_10310_MOESM1_ESM.pdf [file 41598_2017_10310_MOESM1_ESM.pdf]

# Hypnotic analgesia reduces brain responses to pain seen in others

Claire Braboszcz, Edith Brandao-Farinelli, and Patrik Vuilleumier

## 1 **Supplementary information**

### 2 **Multivariate pattern analysis of nociceptive and empathic re-** 3 **sponses**

4 While this was not the primary focus of our study, we conducted a sup-  
5 plementary multivariate voxel-by-voxel pattern analysis (MVPA) to further  
6 test the notion of neural overlap between brain responses to self-pain and  
7 vicarious pain. A cross-classification analysis was performed on cortical ac-  
8 tivity patterns evoked by felt and vicarious pain, in the normal condition  
9 (Corradi-Dell'Acqua et al., 2011). This analysis demonstrated a consistent  
10 overlap of activations at the voxel-by-voxel level within the left insula and  
11 the anterior cingulate cortex. This confirms that empathy for the pain of  
12 others involves brain systems that are recruited when pain is experienced  
13 by oneself and thus modulated by hypnotic analgesia.

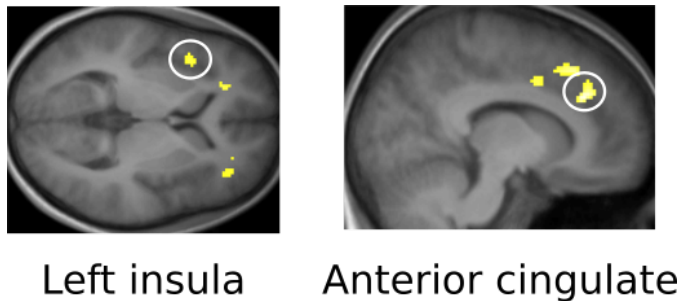

Figure 1: Results of the multi-voxel decoding cross-validation analysis. A classifier was trained on the data from the empathy task using a voxel-by-voxel pattern classification approach (MVPA) and then tested against data from the pain localizer task, in the normal condition (without hypnosis). The maps shows activations corresponding to classification accuracy minus chance score.

| Region at peak                       | x   | y                | z   | size(k) | P        | Z values |
|--------------------------------------|-----|------------------|-----|---------|----------|----------|
| <b>Self-pain</b>                     |     |                  |     |         |          |          |
| <b>Noxious&gt;Non-Noxious Norm.</b>  |     |                  |     |         |          |          |
| Ant. Insula L.                       | -36 | 6                | 0   | 1850    | < 0.001* | 6.65     |
| Ant. Insula L.                       | -30 | 28               | 2   | 1850    | < 0.001* | 6.44     |
| Post. Insula L.                      | -40 | -2               | -4  | 1850    | < 0.001* | 6.24     |
| Post. Insula L.                      | -38 | -20              | 14  | 192     | < 0.001* | 5.84     |
| Ant. Insula R.                       | 36  | 32               | -2  | 1192    | < 0.001* | 6.03     |
| Ant. Insula R.                       | 42  | 12               | 0   | 1192    | < 0.001* | 5.89     |
| Post. Insula R.                      | 44  | -12              | 14  | 40      | 0.007*   | 5.23     |
| Ant. Cingulate Cortex R.             | 10  | 8                | 36  | 1131    | < 0.001* | 6.29     |
| Ant. Cingulate Cortex L.             | 0   | 6                | 42  | 1131    | < 0.001* | 6.08     |
| Supp. Motor Area R.                  | 12  | 6                | 52  | 1131    | 0.001*   | 5.77     |
| Thalamus R.                          | 12  | -10              | 12  | 195     | 0.001*   | 5.77     |
| Thalamus R.                          | 16  | -18              | 10  | 195     | 0.007*   | 5.22     |
| PAG L.                               | -10 | -20              | -12 | 40      | 0.001*   | 5.76     |
| Rolandic Opercular L.                | -38 | -32              | 20  | 192     | 0.001*   | 5.72     |
| Rolandic Opercular R.                | 50  | 6                | 12  | 1192    | < 0.001* | 5.96     |
| Frontal Inferior Orbital R.          | 36  | 32               | -2  | 1192    | < 0.001* | 6.03     |
| SupraMarginal R.                     | 64  | -30              | 24  | 243     | 0.001*   | 5.73     |
| SupraMarginal L.                     | -56 | -28              | 22  | 288     | 0.001*   | 5.72     |
| Putamen R.                           | 24  | 14               | 6   | 1192    | < 0.001* | 6.35     |
| Postcentral R.                       | 60  | -14              | 18  | 243     | 0.002*   | 5.46     |
| Temporal_Inf L.                      | -58 | -38              | 20  | 288     | 0.002*   | 5.52     |
| Temporal_Mid L.                      | -58 | -18              | 20  | 288     | 0.008*   | 5.21     |
| Cerebellum R.                        | 40  | -48              | -32 | 159     | 0.004*   | 5.38     |
| Cerebellum R.                        | 30  | -56              | -30 | 159     | 0.006*   | 5.25     |
| Cerebellum R.                        | 22  | -58              | -30 | 159     | 0.047*   | 4.79     |
| Cerebellum R.                        | 10  | -48              | -14 | 65      | 0.014*   | 5.08     |
| Cerebellum L.                        | -4  | -46              | -16 | 65      | 0.008*   | 5.21     |
| Cerebellum L.                        | -26 | -54              | -30 | 304     | < 0.001* | 5.83     |
| Cerebellum L.                        | -44 | -56              | -34 | 304     | 0.002*   | 5.52     |
| Vermis                               | 0   | -50              | -8  | 65      | 0.013*   | 5.09     |
| <b>Noxious&gt;Non-Noxious Hypno.</b> |     |                  |     |         |          |          |
| Ant. Insula R.                       | 30  | 18               | -8  | 1681    | < 0.001* | 6.78     |
| Ant. Insula R.                       | 40  | 14               | 0   | 1681    | < 0.001* | 6.44     |
| Post. Insula R.                      | 44  | -14              | 14  | 66      | 0.002*   | 5.5      |
| Ant. Insula L.                       | -34 | 18               | -6  | 1412    | < 0.001* | 6.68     |
| Ant. Insula L.                       | -34 | 16               | 2   | 1412    | < 0.001* | 6.46     |
| Ant. Insula L.                       | -32 | 26               | 2   | 1412    | < 0.001* | 6.18     |
| Ant. Cingulate Cortex R.             | 10  | 6                | 34  | 1475    | < 0.001* | 7.2      |
| Ant. Cingulate Cortex L.             | -10 | -10              | 44  | 1475    | 0.001*   | 5.77     |
| Supp. Motor Area L.                  | -4  | 0                | 42  | 1475    | < 0.001* | 6.7      |
| Thalamus L.                          | -16 | -18              | 2   | 105     | 0.006*   | 5.25     |
| Thalamus L.                          | -10 | -12              | -4  | 105     | 0.007*   | 5.24     |
| PAG L.                               | -10 | -20              | -12 | 105     | 0.01*    | 5.15     |
| Rolandic Opercular L.                | -42 | -34              | 20  | 363     | < 0.001* | 5.83     |
| Rolandic Opercular R.                | 48  | -30              | 20  | 487     | 0.001*   | 5.71     |
| Putamen R.                           | 28  | 4                | 8   | 1681    | 0.001*   | 5.73     |
| SupraMarginal R.                     | 58  | -34              | 28  | 487     | 0.001*   | 5.61     |
| SupraMarginal R.                     | -52 | -26              | 20  | 363     | < 0.001* | 5.85     |
| SupraMarginal R.                     | 52  | -22 <sup>2</sup> | 28  | 487     | < 0.001* | 6.23     |
| SupraMarginal L.                     | -48 | -32              | 26  | 363     | 0.004*   | 5.35     |
| Cerebellum R.                        | 12  | -68              | -14 | 272     | 0.002*   | 5.48     |
| Cerebellum R.                        | 12  | -52              | -12 | 272     | 0.003*   | 5.45     |
| Cerebellum R.                        | 8   | -60              | -10 | 272     | 0.003*   | 5.41     |

Table 1: Self pain table of activations for contrasts of interest. Nox: noxious srinuli; Non-Nox: non noxious stimuli; (\*) fwe; (\*\*) fwe with svc. PAG:

| Region at peak                                                                                               | x   | y   | z   | size (k) | P         | Z values |
|--------------------------------------------------------------------------------------------------------------|-----|-----|-----|----------|-----------|----------|
| <b>Seen pain</b>                                                                                             |     |     |     |          |           |          |
| <b>Painful images&gt;Painless images Norm.</b>                                                               |     |     |     |          |           |          |
| Vis. cortex L.                                                                                               | -14 | -96 | -4  | 540      | < 0.001*  | 7.25     |
| Vis. cortex L.                                                                                               | -16 | -96 | 4   | 540      | < 0.001*  | 6.88     |
| Vis. cortex R.                                                                                               | 18  | -88 | -6  | 264      | < 0.001*  | 6.69     |
| Thalamus L.                                                                                                  | -4  | -18 | -4  | 186      | < 0.001*  | 5.96     |
| Thalamus R.                                                                                                  | 4   | -18 | -2  | 186      | 0.001*    | 5.68     |
| Thalamus R.                                                                                                  | 8   | -8  | 0   | 186      | 0.002*    | 5.48     |
| Somatosensory R.                                                                                             | 62  | -24 | 44  | 56       | 0.001*    | 5.63     |
| Somatosensory R.                                                                                             | 64  | -20 | 36  | 56       | 0.004*    | 5.28     |
| Amygdala R.                                                                                                  | 28  | 4   | -22 | 50       | 0.004*    | 5.3      |
| SMA R.                                                                                                       | 12  | 6   | 64  | 86       | 0.07**    | 3.92     |
| Ant. Insula L.                                                                                               | -30 | 24  | 8   | 65       | 0.004**   | 4.62     |
| PAG L.                                                                                                       | -8  | -24 | -10 | 28       | 0.013**   | 4.31     |
| PAG L.                                                                                                       | -12 | -22 | -10 | 28       | 0.02**    | 4.21     |
| <b>Painful images&gt;Painless images Hypno.</b>                                                              |     |     |     |          |           |          |
| Brainstem                                                                                                    | 0   | -38 | -24 | 53       | 0.038**   | 4.12     |
| Vis. cortex L.                                                                                               | -14 | -98 | -8  | 100      | < 0.001*  | 6.20     |
| Vis. cortex R.                                                                                               | 18  | -92 | -8  | 135      | < 0.001*  | 6.05     |
| <b>Excl. masking [painful images&gt;painless images Norm.] by [Painful images&gt;Painless images Hypno.]</b> |     |     |     |          |           |          |
| Ant. Insula L.                                                                                               | -28 | 22  | 8   | 50       | 0.006**   | 4.6      |
| Thalamus L.                                                                                                  | -4  | -20 | -4  | 667      | < 0.001** | 5.8      |
| Thalamus R.                                                                                                  | 4   | -18 | -2  | 667      | < 0.001** | 5.68     |
| Thalamus R.                                                                                                  | 8   | -8  | 0   | 667      | < 0.001** | 5.48     |
| Thalamus R.                                                                                                  | 8   | -8  | 0   | 667      | < 0.001** | 5.48     |
| PAG L                                                                                                        | -10 | -24 | -12 | 667      | 0.01**    | 4.48     |
| Amygdala R.                                                                                                  | 30  | 2   | -18 | 139      | < 0.001** | 5.16     |
| Amygdala R.                                                                                                  | 30  | 2   | -24 | 139      | 0.004**   | 4.68     |
| Amygdala R.                                                                                                  | 26  | 2   | -22 | 139      | 0.004**   | 4.68     |
| Brainstem L.                                                                                                 | -8  | -18 | -6  | 667      | 0.035**   | 4.14     |
| Brainstem R.                                                                                                 | 14  | -18 | -6  | 667      | 0.006**   | 4.58     |

Table 2: Activation table for seen pain in hypnosis, (\*) fwe; (\*\*) fwe with svc; Vis.: visual; PAG: periaqueductal grey; SMA: supplementary motor area; Ant. anterior; Post: posterior

| Region at peak                                                                                                                  | x   | y   | z   | size(k) | P        | Z values |
|---------------------------------------------------------------------------------------------------------------------------------|-----|-----|-----|---------|----------|----------|
| <b>Oddball and "go" stimuli</b>                                                                                                 |     |     |     |         |          |          |
| <b>[Go+Oddball stimuli Normal] &gt; [Painful images + Painless images Normal]</b>                                               |     |     |     |         |          |          |
| Sensorimotor R.                                                                                                                 | 44  | -18 | 56  | 207     | < 0.001* | 6.13     |
| Sensorimotor R.                                                                                                                 | 48  | -18 | 46  | 207     | 0.001*   | 5.72     |
| Sensorimotor R.                                                                                                                 | 40  | -26 | 58  | 207     | 0.01*    | 5.13     |
| <b>[Go+Oddball stimuli Hypno] &gt; [Painful images + Painless images Hypno]</b>                                                 |     |     |     |         |          |          |
| Sensorimotor R.                                                                                                                 | 46  | -22 | 54  | 1036    | < 0.001* | 6.32     |
| Sensorimotor R.                                                                                                                 | 32  | -24 | 54  | 1036    | < 0.001* | 6.32     |
| Cingular med. R.                                                                                                                | 6   | -12 | 48  | 351     | < 0.001* | 7.22     |
| SMA R.                                                                                                                          | 12  | -6  | 50  | 351     | < 0.001* | 6.91     |
| SMA R.                                                                                                                          | 6   | 2   | 40  | 351     | 0.001*   | 5.67     |
| Post. Insula R.                                                                                                                 | 50  | -14 | 14  | 151     | < 0.001* | 6.08     |
| Rolandic Opercular R.                                                                                                           | 50  | -20 | 20  | 151     | 0.002*   | 5.45     |
| Post. Insula R.                                                                                                                 | 40  | -2  | 12  | 151     | 0.005*   | 5.27     |
| Parietal Inf. L.                                                                                                                | -52 | -56 | 40  | 72      | 0.001*   | 5.58     |
| Parietal Inf. L.                                                                                                                | -48 | -54 | 50  | 72      | 0.005*   | 5.28     |
| Angular gyrus R.                                                                                                                | 48  | -70 | 36  | 73      | 0.002*   | 5.48     |
| Inferior parietal lobule R.                                                                                                     | 44  | -60 | 38  | 73      | 0.012*   | 5.1      |
| Middle temporal gyrus R.                                                                                                        | 62  | -18 | -18 | 30      | 0.002*   | 5.44     |
| Middle temporal gyrus R.                                                                                                        | 62  | -26 | -14 | 30      | 0.01*    | 5.14     |
| <b>Interaction [Painful images Norm &gt; Painful images Hypno] &gt; [Go+Oddball stimuli Norm &gt; Go+Oddball stimuli Hypno]</b> |     |     |     |         |          |          |
| Ant. Insula L.                                                                                                                  | -34 | 12  | 2   | 206     | 0.497**  | 3.35     |
| Ant. Insula L.                                                                                                                  | -32 | 12  | -8  | 206     | 0.542**  | 3.31     |
| SMA R.                                                                                                                          | 6   | 12  | 50  | 103     | 0.042**  | 4.18     |
| SMA R.                                                                                                                          | 4   | 10  | 54  | 103     | 0.045**  | 4.16     |
| SMA R.                                                                                                                          | 2   | 14  | 52  | 103     | 0.068**  | 4.05     |
| Ant. Insula R.                                                                                                                  | 32  | 24  | 8   | 107     | 0.104**  | 3.92     |
| Ant. Insula R.                                                                                                                  | 36  | 26  | 6   | 107     | 0.138**  | 3.84     |
| Ant. Insula R.                                                                                                                  | 34  | 24  | -2  | 107     | 0.223**  | 3.68     |
| Amygdala R.                                                                                                                     | 34  | 6   | -20 | 36      | 0.001    | 3.14     |
| Amygdala R.                                                                                                                     | 36  | 2   | -24 | 36      | 0.002    | 2.95     |
| Amygdala R.                                                                                                                     | 38  | -4  | -26 | 36      | 0.002    | 2.88     |

Table 3: Activation table in response to "go" and oddball stimuli, (\*) fwe; (\*\*) fwe with svc.
